# Supplementary material
Source: PubMed Central journal article supplement (PMC6646086)
Supplement: NIHMS1532209-supplement-Supplemental_Material.pdf [file NIHMS1532209-supplement-Supplemental_Material.pdf]

## Supplemental Material

### References

- (1) Mackowiak PA. Recycling metchnikoff: probiotics, the intestinal microbiome and the quest for long life. *Front Public Health* . 2013;1:52.
- (2) Podolsky SH. Metchnikoff and the microbiome. *Lancet* . 2012;380:1810-1811.
- (3) Levy M, Kolodziejczyk AA, Thaïss CA, Elinav E. Dysbiosis and the immune system. *Nat Rev Immunol* . 2017;17:219-232.
- (4) Thaïss CA, Zmora N, Levy M, Elinav E. The microbiome and innate immunity. *Nature* . 2016;535:65-74.
- (5) Russo E, Taddei A, Ringressi MN, Ricci F, Amedei A. The interplay between the microbiome and the adaptive immune response in cancer development. *Therap Adv Gastroenterol* . 2016;9:594-605.
- (6) Li M, Wang M, Donovan SM. Early development of the gut microbiome and immune-mediated childhood disorders. *Semin Reprod Med* . 2014;32:74-86.
- (7) Salzman NH. The role of the microbiome in immune cell development. *Ann Allergy Asthma Immunol* . 2014;113:593-598.
- (8) Taschuk R, Griebel PJ. Commensal microbiome effects on mucosal immune system development in the ruminant gastrointestinal tract. *Anim Health Res Rev* . 2012;13:129-141.
- (9) Kamada N, Chen GY, Inohara N, Nunez G. Control of pathogens and pathobionts by the gut microbiota. *Nat Immunol* . 2013;14:685-690.
- (10) Ohland CL, Jobin C. Microbial activities and intestinal homeostasis: A delicate balance between health and disease. *Cell Mol Gastroenterol Hepatol* . 2015;1:28-40.
- (11) Cani PD, Bibiloni R, Knauf C, Waget A, Neyrinck AM, Delzenne NM, et al. Changes in gut microbiota control metabolic endotoxemia-induced inflammation in high-fat diet-induced obesity and diabetes in mice. *Diabetes* . 2008;57:1470-1481.
- (12) Cani PD, Amar J, Iglesias MA, Poggi M, Knauf C, Bastelica D, et al. Metabolic endotoxemia initiates obesity and insulin resistance. *Diabetes* . 2007;56:1761-1772.
- (13) Tang WH, Hazen SL. The contributory role of gut microbiota in cardiovascular disease. *J Clin Invest* . 2014;124:4204-4211.

- (14) Gregory JC, Buffa JA, Org E, Wang Z, Levison BS, Zhu W, et al. Transmission of atherosclerosis susceptibility with gut microbial transplantation. *J Biol Chem* . 2015;290:5647-5660.
- (15) Durgan DJ. Obstructive Sleep Apnea-Induced Hypertension: Role of the Gut Microbiota. *Curr Hypertens Rep* . 2017;19.
- (16) Santisteban MM, Qi Y, Zubcevic J, Kim S, Yang T, Shenoy V, et al. Hypertension-Linked Pathophysiological Alterations in the Gut. *Circ Res* . 2017;120:312-323.
- (17) Mell B, Jala VR, Mathew AV, Byun J, Waghulde H, Zhang Y, et al. Evidence for a link between gut microbiota and hypertension in the Dahl rat. *Physiol Genomics* . 2015;47:187-197.
- (18) Fransen F, van Beek AA, Borghuis T, Aidy SE, Hugenholtz F, van der Gaast-de Jongh C, et al. Aged Gut Microbiota Contributes to Systemic Inflammation after Transfer to Germ-Free Mice. *Front Immunol* . 2017;8:1385.
- (19) Furness JB, Callaghan BP, Rivera LR, Cho HJ. The enteric nervous system and gastrointestinal innervation: integrated local and central control. *Adv Exp Med Biol* . 2014;817:39-71.
- (20) de Jonge WJ. The Gut's Little Brain in Control of Intestinal Immunity. *ISRN Gastroenterol* . 2013;2013:630159.
- (21) Lundgren O. Sympathetic input into the enteric nervous system. *Gut* . 2000;47 Suppl 4:iv33-5; discussion iv36.
- (22) Carabotti M, Scirocco A, Maselli MA, Severi C. The gut-brain axis: interactions between enteric microbiota, central and enteric nervous systems. *Ann Gastroenterol* . 2015;28:203-209.
- (23) Bonaz B, Bazin T, Pellissier S. The Vagus Nerve at the Interface of the Microbiota-Gut-Brain Axis. *Front Neurosci* . 2018;12:49.
- (24) Bonaz B, Sinniger V, Pellissier S. The Vagus Nerve in the Neuro-Immune Axis: Implications in the Pathology of the Gastrointestinal Tract. *Front Immunol* . 2017;8:1452.
- (25) Cusotto S, Sandhu KV, Dinan TG, Cryan JF. The Neuroendocrinology of the Microbiota-Gut-Brain Axis: A Behavioural Perspective. *Front Neuroendocrinol* . 2018;51:80-101.
- (26) Gaykema RP, Goehler LE, Lyte M. Brain response to cecal infection with *Campylobacter jejuni*: analysis with Fos immunohistochemistry. *Brain Behav Immun* . 2004;18:238-245.

- (27) Lyte M. Microbial endocrinology: Host-microbiota neuroendocrine interactions influencing brain and behavior. *Gut Microbes* . 2014;5:381-389.
- (28) Rothhammer V, Mascanfroni ID, Bunse L, Takenaka MC, Kenison JE, Mayo L, et al. Type I interferons and microbial metabolites of tryptophan modulate astrocyte activity and central nervous system inflammation via the aryl hydrocarbon receptor. *Nat Med* . 2016;22:586-597.
- (29) Sun J, Wang F, Hong G, Pang M, Xu H, Li H, et al. Antidepressant-like effects of sodium butyrate and its possible mechanisms of action in mice exposed to chronic unpredictable mild stress. *Neurosci Lett* . 2016;618:159-166.
- (30) Hoyles L, Snelling T, Umlai UK, Nicholson JK, Carding SR, Glen RC, et al. Microbiome-host systems interactions: protective effects of propionate upon the blood-brain barrier. *Microbiome* . 2018;6:55-018-0439-y.
- (31) Martin CR, Osadchiy V, Kalani A, Mayer EA. The Brain-Gut-Microbiome Axis. *Cell Mol Gastroenterol Hepatol* . 2018;6:133-148.
- (32) Pluznick JL. Microbial Short-Chain Fatty Acids and Blood Pressure Regulation. *Curr Hypertens Rep* . 2017;19:25-017-0722-5.
- (33) Marques FZ, Nelson E, Chu PY, Horlock D, Fiedler A, Ziemann M, et al. High-Fiber Diet and Acetate Supplementation Change the Gut Microbiota and Prevent the Development of Hypertension and Heart Failure in Hypertensive Mice. *Circulation* . 2017;135:964-977.
- (34) Delzenne NM, Neyrinck AM, Backhed F, Cani PD. Targeting gut microbiota in obesity: effects of prebiotics and probiotics. *Nat Rev Endocrinol* . 2011;7:639-646.
- (35) Kasubuchi M, Hasegawa S, Hiramatsu T, Ichimura A, Kimura I. Dietary gut microbial metabolites, short-chain fatty acids, and host metabolic regulation. *Nutrients* . 2015;7:2839-2849.
- (36) Qin J, Li Y, Cai Z, Li S, Zhu J, Zhang F, et al. A metagenome-wide association study of gut microbiota in type 2 diabetes. *Nature*. 2012;490:55-60.
- (37) Karlsson F, Tremaroli V, Nielsen J, Backhed F. Assessing the human gut microbiota in metabolic diseases. *Diabetes* . 2013;62:3341-3349.
- (38) Karlsson FH, Tremaroli V, Nookaew I, Bergstrom G, Behre CJ, Fagerberg B, et al. Gut metagenome in European women with normal, impaired and diabetic glucose control. *Nature* . 2013;498:99-103.
- (39) Li J, Zhao F, Wang Y, Chen J, Tao J, Tian G, et al. Gut microbiota dysbiosis contributes to the development of hypertension. *Microbiome*. 2017;5:14-016-0222-x.

- (40) Karbach SH, Schonfelder T, Brandao I, Wilms E, Hormann N, Jackel S, et al. Gut Microbiota Promote Angiotensin II-Induced Arterial Hypertension and Vascular Dysfunction. *J Am Heart Assoc*. 2016;5:10.1161/JAHA.116.003698.
- (41) Arora T, Backhed F. The gut microbiota and metabolic disease: current understanding and future perspectives. *J Intern Med* . 2016;280:339-349.
- (42) Backhed F, Manchester JK, Semenkovich CF, Gordon JI. Mechanisms underlying the resistance to diet-induced obesity in germ-free mice. *Proc Natl Acad Sci U S A* . 2007;104:979-984.
- (43) Ridaura VK, Faith JJ, Rey FE, Cheng J, Duncan AE, Kau AL, et al. Gut microbiota from twins discordant for obesity modulate metabolism in mice. *Science* . 2013;341:1241214.
- (44) Vrieze A, Van Nood E, Holleman F, Salojarvi J, Kootte RS, Bartelsman JF, et al. Transfer of intestinal microbiota from lean donors increases insulin sensitivity in individuals with metabolic syndrome. *Gastroenterology* . 2012;143:913-6.e7.
- (45) Cox LM, Blaser MJ. Antibiotics in early life and obesity. *Nat Rev Endocrinol* . 2015;11:182-190.
- (46) Maruvada P, Leone V, Kaplan LM, Chang EB. The Human Microbiome and Obesity: Moving beyond Associations. *Cell Host Microbe* . 2017;22:589-599.
- (47) Penney NC, Kinross J, Newton RC, Purkayastha S. The role of bile acids in reducing the metabolic complications of obesity after bariatric surgery: a systematic review. *Int J Obes (Lond)* . 2015;39:1565-1574.
- (48) Cani PD, Delzenne NM. Involvement of the gut microbiota in the development of low grade inflammation associated with obesity: focus on this neglected partner. *Acta Gastroenterol Belg* . 2010;73:267-269.
- (49) Li T, Gua C, Wu B, Chen Y. Increased circulating trimethylamine N-oxide contributes to endothelial dysfunction in a rat model of chronic kidney disease. *Biochem Biophys Res Commun* . 2018;495:2071-2077.
- (50) Ito S, Osaka M, Higuchi Y, Nishijima F, Ishii H, Yoshida M. Indoxyl sulfate induces leukocyte-endothelial interactions through up-regulation of E-selectin. *J Biol Chem* . 2010;285:38869-38875.
- (51) Dou L, Jourde-Chiche N, Faure V, Cerini C, Berland Y, Dignat-George F, et al. The uremic solute indoxyl sulfate induces oxidative stress in endothelial cells. *J Thromb Haemost* . 2007;5:1302-1308.

- (52) Barreto FC, Barreto DV, Liabeuf S, Meert N, Glorieux G, Temmar M, et al. Serum indoxyl sulfate is associated with vascular disease and mortality in chronic kidney disease patients. *Clin J Am Soc Nephrol* . 2009;4:1551-1558.
- (53) Li DY, Tang WHW. Contributory Role of Gut Microbiota and Their Metabolites Toward Cardiovascular Complications in Chronic Kidney Disease. *Semin Nephrol* . 2018;38:193-205.
- (54) Wang Z, Klipfell E, Bennett BJ, Koeth R, Levison BS, Dugar B, et al. Gut flora metabolism of phosphatidylcholine promotes cardiovascular disease. *Nature* . 2011;472:57-63.
- (55) Tang WH, Wang Z, Fan Y, Levison B, Hazen JE, Donahue LM, et al. Prognostic value of elevated levels of intestinal microbe-generated metabolite trimethylamine-N-oxide in patients with heart failure: refining the gut hypothesis. *J Am Coll Cardiol* . 2014;64:1908-1914.
- (56) Frigues AG, Arpini CM, Kalil IC, Gava AL, Leal MA, Porto ML, et al. Chronic administration of the probiotic kefir improves the endothelial function in spontaneously hypertensive rats. *J Transl Med* . 2015;13:390-015-0759-7.
- (57) Robles-Vera I, Toral M, de la Visitacion N, Sanchez M, Romero M, Olivares M, et al. The probiotic *Lactobacillus fermentum* prevents dysbiosis and vascular oxidative stress in rats with hypertension induced by chronic nitric oxide blockade. *Mol Nutr Food Res* . 2018:e1800298.
- (58) Soenen S, Rayner CK, Jones KL, Horowitz M. The ageing gastrointestinal tract. *Curr Opin Clin Nutr Metab Care* . 2016;19:12-18.
- (59) Tran L, Greenwood-Van Meerveld B. Age-associated remodeling of the intestinal epithelial barrier. *J Gerontol A Biol Sci Med Sci* . 2013;68:1045-1056.
- (60) Rehman T. Role of the gut microbiota in age-related chronic inflammation. *Endocr Metab Immune Disord Drug Targets* . 2012;12:361-367.
- (61) Calvani R, Picca A, Lo Monaco MR, Landi F, Bernabei R, Marzetti E. Of Microbes and Minds: A Narrative Review on the Second Brain Aging. *Front Med (Lausanne)* . 2018;5:53.
- (62) Hopkins MJ, Sharp R, Macfarlane GT. Age and disease related changes in intestinal bacterial populations assessed by cell culture, 16S rRNA abundance, and community cellular fatty acid profiles. *Gut* . 2001;48:198-205.
- (63) Miquel S, Martin R, Rossi O, Bermudez-Humaran LG, Chatel JM, Sokol H, et al. *Faecalibacterium prausnitzii* and human intestinal health. *Curr Opin Microbiol* . 2013;16:255-261.

- (64) Franceschi C, Bonafe M, Valensin S, Olivieri F, De Luca M, Ottaviani E, et al. Inflamm-aging. An evolutionary perspective on immunosenescence. *Ann N Y Acad Sci* . 2000;908:244-254.
- (65) Minciullo PL, Catalano A, Mandraffino G, Casciaro M, Crucitti A, Maltese G, et al. Inflammaging and Anti-Inflammaging: The Role of Cytokines in Extreme Longevity. *Arch Immunol Ther Exp (Warsz)* . 2016;64:111-126.
- (66) Benjamin EJ, Virani SS, Callaway CW, Chamberlain AM, Chang AR, Cheng S, et al. Heart Disease and Stroke Statistics-2018 Update: A Report From the American Heart Association. *Circulation* . 2018;137:e67-e492.
- (67) Pavlov VA, Wang H, Czura CJ, Friedman SG, Tracey KJ. The cholinergic anti-inflammatory pathway: a missing link in neuroimmunomodulation. *Mol Med* . 2003;9:125-134.
- (68) Elenkov IJ, Wilder RL, Chrousos GP, Vizi ES. The sympathetic nerve--an integrative interface between two supersystems: the brain and the immune system. *Pharmacol Rev* . 2000;52:595-638.
- (69) Mayer EA, Knight R, Mazmanian SK, Cryan JF, Tillisch K. Gut microbes and the brain: paradigm shift in neuroscience. *J Neurosci* . 2014;34:15490-15496.
- (70) Main BS, Minter MR. Microbial Immuno-Communication in Neurodegenerative Diseases. *Front Neurosci* . 2017;11:151.
- (71) Sampson TR, Debelius JW, Thron T, Janssen S, Shastri GG, Ilhan ZE, et al. Gut Microbiota Regulate Motor Deficits and Neuroinflammation in a Model of Parkinson's Disease. *Cell* . 2016;167:1469-1480.e12.
- (72) Minter MR, Zhang C, Leone V, Ringus DL, Zhang X, Oyler-Castrillo P, et al. Antibiotic-induced perturbations in gut microbial diversity influences neuro-inflammation and amyloidosis in a murine model of Alzheimer's disease. *Sci Rep* . 2016;6:30028.
- (73) Sgritta M, Dooling SW, Buffington SA, Momin EN, Francis MB, Britton RA, et al. Mechanisms Underlying Microbial-Mediated Changes in Social Behavior in Mouse Models of Autism Spectrum Disorder. *Neuron* . 2018.
- (74) Klarer M, Arnold M, Gunther L, Winter C, Langhans W, Meyer U. Gut vagal afferents differentially modulate innate anxiety and learned fear. *J Neurosci* . 2014;34:7067-7076.
- (75) Schroeder BO, Backhed F. Signals from the gut microbiota to distant organs in physiology and disease. *Nat Med* . 2016;22:1079-1089.

- (76) Liu L, Xiong XY, Zhang Q, Fan XT, Yang QW. The Efficacy of Prophylactic Antibiotics on Post-Stroke Infections: An Updated Systematic Review and Meta-Analysis. *Sci Rep* . 2016;6:36656.
- (77) Liu F, Yuan R, Benashski SE, McCullough LD. Changes in experimental stroke outcome across the life span. *J Cereb Blood Flow Metab* . 2009;29:792-802.
- (78) Manwani B, Friedler B, Verma R, Venna VR, McCullough LD, Liu F. Perfusion of ischemic brain in young and aged animals: a laser speckle flowmetry study. *Stroke* . 2014;45:571-578.
- (79) Ritzel RM, Lai YJ, Crapser JD, Patel AR, Schrecengost A, Grenier JM, et al. Aging alters the immunological response to ischemic stroke. *Acta Neuropathol* . 2018;136:89-110.
- (80) Manwani B, Liu F, Xu Y, Persky R, Li J, McCullough LD. Functional recovery in aging mice after experimental stroke. *Brain Behav Immun* . 2011;25:1689-1700.
- (81) Gevers D, Knight R, Petrosino JF, Huang K, McGuire AL, Birren BW, et al. The Human Microbiome Project: a community resource for the healthy human microbiome. *PLoS Biol* . 2012;10:e1001377.
- (82) Lloyd-Price J, Mahurkar A, Rahnavard G, Crabtree J, Orvis J, Hall AB, et al. Strains, functions and dynamics in the expanded Human Microbiome Project. *Nature* . 2017;550:61-66.
